# Supplementary material for: An open source refactoring of the Canadian small lakes model for estimates of evaporation from medium sized reservoirs
Source: Copernicus journal article supplement (doi:10.5194/egusphere-2023-3093), 2024-01-18
Supplement: Supplementary file 1 [file egusphere-2023-3093-supplement.pdf]

| <b>OldName</b> | <b>NewName</b>               | <b>Definition</b>                                                                                              |
|----------------|------------------------------|----------------------------------------------------------------------------------------------------------------|
| ALBSLGAT       | SnowPackAlbedo               | Snow albedo [ ]                                                                                                |
| ALBSLROT       | SnowPackAlbedo_In            | Snow albedo [ ] (ROT)                                                                                          |
| ALILROT        | DiagTotalNIRAtLakeSurface_In | Diagnosed total near-infrared albedo of lake surface [ ] (ROT)                                                 |
| ALVLGAT        | DiagTotalVisAtLakeSurface    | Diagnosed total visible albedo of lake surface [ ]                                                             |
| ALVLROT        | DiagTotalVisAtLakeSurface_In | Diagnosed total visible albedo of lake surface [ ] (ROT)                                                       |
| ASIDROT        | SnowAlbedoNIR_In             | Optional user-specified value of snow near-infrared albedo to override CLASS-calculated value [ ] (ROT)        |
| ASILGAT        | SnowAlbedoNIR                | Optional user-specified value of snow near-infrared albedo to override CLASS-calculated value [ ] (ROT)        |
| ASVDROT        | SnowAlbedoVis_In             | Optional user-specified value of snow visible albedo to override CLASS-calculated value (ROT)                  |
| ASVLGAT        | SnowAlbedoVis                | Optional user-specified value of snow visible albedo to override CLASS-calculated value (ROT)                  |
| BCSNROT        | --                           | Removed, had no purpose                                                                                        |
| BLAKGAT        | ExtinctionCoeff              | Beers Law Parameter - extinction coefficient (ROT)                                                             |
| BLAKROT        | ExtinctionCoeff_In           | Beers Law Parameter - extinction coefficient (ROT)                                                             |
| CDHGAT         | SurfDragCoeffForHeat         | Surface drag coefficient for heat [ ] (CDH)                                                                    |
| CDHROT         | SurfDragCoeffForHeat_In      | Surface drag coefficient for heat [ ] (CDH)                                                                    |
| CDMGAT         | SurfDragCoeffForMomentum     | Surface drag coefficient for momentum [ ] (CDM)                                                                |
| CDMROT         | SurfDragCoeffForMomentum_In  | Surface drag coefficient for momentum [ ] (CDM)                                                                |
| CGRAV          | --                           | Acceleration due to gravity [m s <sup>-1</sup> ], removed and just used GRAV instead since they are equivalent |
| CKARM          | --                           | Von Karman constant [-], removed and just used VKC                                                             |
| CLHMLT         | LatentHeatOfFreezingH2O      | Latent heat of freezing of water [J kg <sup>-1</sup> ], defined as 0.334 x 10 <sup>6</sup>                     |
| CLHVAP         | LatentHeatOfVaporizationH2O  | Latent heat of vaporization of water [J kg <sup>-1</sup> ], defined as 2.501 x 10 <sup>6</sup>                 |
| COSZ           | CosineOfSolarZenith_Temp     |                                                                                                                |
| CPD            | --                           | Specific heat of air [J kg <sup>-1</sup> K <sup>-1</sup> ]                                                     |
| CSZGAT         | CosineOfSolarZenith          | Cosine of solar zenith angle [ ]                                                                               |
| CSZROW         | CosineOfSolarZenith_In       | Cosine of solar zenith angle [ ]                                                                               |
| CTLSTP         | ChangeInInternalLakeEnergy   | Change in internal energy of lake over current time step [W m <sup>-2</sup> ]                                  |
| DAY            | CurrentDecimalDay            | Decimal Day                                                                                                    |
| DECL           | Declanation                  | Declanation                                                                                                    |
| DEGLAT         | LatitudeInDeg_In             | Load from the lake.ini (4th line, 7th value)                                                                   |

|         |                             |                                                                 |
|---------|-----------------------------|-----------------------------------------------------------------|
| DEGLON  | LongitudeInDeg_In           | Load from the lake.ini (4th line, 8th value)                    |
| DELMAX  | MaxThermoclineThickness     | Maximum thermocline thickness [m]                               |
| DELMIN  | MinThermoclineThickness     | Minimum thermocline thickness [m]                               |
| DELSKIN | ThicknessOfSurfaceSkin      | Thickness of lake surface skin [m]                              |
| DELT    | DeltaTimeStep               | Time step [s]                                                   |
| DELU    | MeanMixLyrMomentum          | Shear Flow / Mean layer momentum                                |
| DELZLK  | LakeLayerThickness          | Thickness of lake layers [m]                                    |
| DHMAX   | MaxDeltaThermoclineDepth    | Maximum change in thermocline depth in one timestep [m]         |
| DRLGAT  | LakeSurfaceDragAtNeutral    | Lake Surface drag coefficient under neutral stability [ ]       |
| DRLROT  | LakeSurfaceDragAtNeutral_In | Lake Surface drag coefficient under neutral stability [ ] (ROT) |
| DTEMP   | ThermoclineTempDelta        | Temperature delta over the thermocline                          |
| DUMAX   | MaxDeltaMixingLayer         | Maximum change in mixing layer momentum in one timestep         |
| EFLGAT  | EvapEfficiencyAtLakeSurf    | Evaporation efficiency at lake surface [ ]                      |
| EFLROT  | EvapEfficiencyAtLakeSurf_In | Evaporation efficiency at lake surface [ ] (ROT)                |
| EMSW    | ThermalEmissivityOfH2O      | Thermal emissivity of water                                     |
| EXPW    | ExpansivityOfWater          | Expansivity                                                     |

|          |                                         |                                                                                                                                                                                                                                   |
|----------|-----------------------------------------|-----------------------------------------------------------------------------------------------------------------------------------------------------------------------------------------------------------------------------------|
| FAREROT  | FractionalCoverageOfMosaicTileOnArea_In | This is passed in .ini file. Both MID and FARE are the 6th line of ini, FARE is set to 1 (MID = 0). Looks like some sort of sub-grid machinery. If Fare is >0 land indexing is used, otherwise water indexing is used (lines 914) |
| FDLGAT   | LongwaveDownwelling                     | Downwelling longwave radiation at bottom of atmosphere [W m-2]                                                                                                                                                                    |
| FDLROW   | LongwaveDownwelling_In                  | Downwelling longwave radiation at bottom of atmosphere [W m-2]                                                                                                                                                                    |
| FLGLGAT  | DiagNetLongwaveAtLakeSurface            | Diagnosed net longwave radiation at lake surface [W m2]                                                                                                                                                                           |
| FLGLROT  | DiagNetLongwaveAtLakeSurface_In         | Diagnosed net longwave radiation at lake surface [W m2]                                                                                                                                                                           |
| FLGSLGAT | DiagNetLongwaveAtSnowSurface            | Diagnosed net longwave radiation at snow surface [W m-2]                                                                                                                                                                          |
| FLGSLROT | DiagNetLongwaveAtSnowSurface_In         | Diagnosed net longwave radiation at snow surface [W m-2] (ROT)                                                                                                                                                                    |
| FSDLGAT  | --                                      | Not used                                                                                                                                                                                                                          |
| FADBROL  | --                                      | Not used                                                                                                                                                                                                                          |
| FSDOWN   | ShortwaveDownwelling_In                 | only the total incoming shortwave radiation FSDOWN is available; it is partitioned 50:50 between the incoming visible (FSVHROW) and near-infrared (FSIHROW) radiation.                                                            |
| FSFBLGAT | --                                      | Not used                                                                                                                                                                                                                          |
| FSFBROL  | --                                      | Not used                                                                                                                                                                                                                          |
| FSGLGAT  | DiagNetShortwaveAtLakeSurface           | Diagnosed net shortwave radiation at lake surface [W m2]                                                                                                                                                                          |

|          |                                   |                                                                                                                                                                                                                                            |
|----------|-----------------------------------|--------------------------------------------------------------------------------------------------------------------------------------------------------------------------------------------------------------------------------------------|
| FSGLR0T  | DiagNetShortwaveAtLakeSurface_In  | Diagnosed net shortwave radiation at lake surface [W m <sup>2</sup> ]                                                                                                                                                                      |
| FSGSLGAT | DiagNetShortwaveAtSnowSurface     | Diagnosed net shortwave radiation at snow surface [W m <sup>-2</sup> ]                                                                                                                                                                     |
| FSGSLROT | DiagNetShortwaveAtSnowSurface_In  | Diagnosed net shortwave radiation at snow surface [W m <sup>-2</sup> ] (ROT)                                                                                                                                                               |
| FSIHGAT  | NIRIncidentOnSurf                 | Near-infrared radiation incident on horizontal surface [W m <sup>-2</sup> ]                                                                                                                                                                |
| FSIHROW  | NIRIncidentOnSurf_In              | Near-infrared radiation incident on horizontal surface [W m <sup>-2</sup> ]                                                                                                                                                                |
| FSSBLGAT | ShortwaveDownwellingIRandVIS      | Something about shortwave, used in TSOLVE with albedo<br>This is assigned from FSSBROL(1,1)=FSIH and FSSBROL(1,2)=FSVH which are NIR and Vis incident on a horizontal surface, which are each simply 0.5 of FSDOWN (shortwave downwelling) |
| FSSBROL  | ShortwaveDownwellingIRAandVIS_In  |                                                                                                                                                                                                                                            |
| FSVHGAT  | VisibleIncidentOnSurf             | Visible radiation incident on horizontal surface [W m <sup>-2</sup> ]                                                                                                                                                                      |
| FSVHROW  | VisibleIncidentOnSurf_In          | Visible radiation incident on horizontal surface [W m <sup>-2</sup> ]                                                                                                                                                                      |
| GCROW    | SubareaFractionalCoverage_In      | Subarea fractional coverage of modelled area [ ]                                                                                                                                                                                           |
| GRAV     | GravConstant                      | Gravitational Constant fixed to 10 <sup>-5</sup> precision [m s <sup>-1</sup> ]                                                                                                                                                            |
| GRED     | ReducedGravity                    | Reduced Gravity due to density of the mixed layer                                                                                                                                                                                          |
| GTLGAT   | DiagSurfBlkBodyTemp               | Diagnosed effective surface black-body temperature [K]                                                                                                                                                                                     |
| GTLROT   | DiagSurfBlkBodyTemp_In            | Diagnosed effective surface black-body temperature [K] (ROT)                                                                                                                                                                               |
| HCAP     | HeatCapacityOfLakeSurface         |                                                                                                                                                                                                                                            |
| HCPICE   | HeatCapacityOfIce                 | Volumetric heat capacity of ice [J m <sup>-3</sup> K <sup>-1</sup> ], defined as 1.9257 x 10 <sup>6</sup>                                                                                                                                  |
| HCPW     | HeatCapacityOfH2O                 | Volumetric heat capacity of water [J m <sup>-3</sup> K <sup>-1</sup> ], defined as 4.187 x 10 <sup>6</sup>                                                                                                                                 |
| HDPTH    | DepthToThermocline                | Mixed Layer depth                                                                                                                                                                                                                          |
| HDPTHMIN | MinimumMixingDepth                | Minimum mixing depth [m], set at 0.5                                                                                                                                                                                                       |
| HEVLGAT  | DiagLatentHeatOnLake              | Diagnosed total surface latent heat flux on Lake [W m <sup>2</sup> ]                                                                                                                                                                       |
| HEVLROT  | DiagLatentHeatOnLake_In           | Diagnosed total surface latent heat flux on Lake [W m <sup>2</sup> ] (ROT)                                                                                                                                                                 |
| HEVSLGAT | DiagLatentHeatOnSnow              | Diagnosed latent heat flux at snow surface [W m <sup>-2</sup> ]                                                                                                                                                                            |
| HEVSLROT | DiagLatentHeatOnSnow_In           | Diagnosed latent heat flux at snow surface [W m <sup>-2</sup> ] (ROT)                                                                                                                                                                      |
| HFSLGAT  | DiagSensHeatOnLake                | Diagnosed total surface sensible heat flux on Lake [W m <sup>2</sup> ]                                                                                                                                                                     |
| HFSLROT  | DiagSensHeatOnLake_In             | Diagnosed total surface sensible heat flux on Lake [W m <sup>2</sup> ] (ROT)                                                                                                                                                               |
| HFSSLGAT | DiagSensHeatOnSnow                | Diagnosed sensible heat flux at snow surface [W m <sup>-2</sup> ]                                                                                                                                                                          |
| HFSSLROT | DiagSensHeatOnSnow_In             | Diagnosed sensible heat flux at snow surface [W m <sup>-2</sup> ] (ROT)                                                                                                                                                                    |
| HLAKGAT  | LakeDepth                         | Depth of the lake                                                                                                                                                                                                                          |
| HLAKROT  | LakeDepth_In                      | Depth of the lake (ROT)                                                                                                                                                                                                                    |
| HMFLGAT  | DiagPhaseChangeWaterAtLakeSurface | Diagnosed energy associated with phase change of water on lake [W m <sup>-2</sup> ]                                                                                                                                                        |

|          |                                       |                                                                                                           |
|----------|---------------------------------------|-----------------------------------------------------------------------------------------------------------|
| HMFLROT  | DiagPhaseChangeWaterAtLakeSurface_In  | Diagnosed energy associated with phase change of water on lake [W m-2]                                    |
| HMFNLGAT | DiagPhaseChangeWaterInSnow            | Diagnosed energy associated with phase change of water in snow [W m-2]                                    |
| HMFNLROT | DiagPhaseChangeWaterInSnow_In         | Diagnosed energy associated with phase change of water in snow [W m-2] (ROT)                              |
| HOUR     | SolarHour                             |                                                                                                           |
| HTCLGAT  | DiagDelEnergyDueConducOrMassInLake    | Diagnosed internal energy change of lake due to conduction and/or change in mass [W m-2]                  |
| HTCLROT  | DiagDelEnergyDueConducOrMassInLake_In | Diagnosed internal energy change of lake due to conduction and/or change in mass [W m-2] (ROT)            |
| HTCSLGAT | DiagDelEnergyDueConducOrMassInSnow    | Diagnosed internal energy change of snow pack due to conduction and/or change in mass [W m-2]             |
| HTCSLROT | DiagDelEnergyDueConducOrMassInSnow_In | Diagnosed internal energy change of snow pack due to conduction and/or change in mass [W m-2] (ROT)       |
| IALS     |                                       | Switches for the codebase, mostly CLASS related                                                           |
| ICEBOT   | IceBottomDepth                        | Bottom of ice layer                                                                                       |
| ICETOP   | IceTopDepth                           | Top of ice layer                                                                                          |
| IDAY     | CurrentDay                            | Julian Day of the Year                                                                                    |
| IGL      |                                       |                                                                                                           |
| Ihour    | CurrentHour                           | Hour of the day                                                                                           |
| ILG      | NumOfTilesInAllGrids                  | Product of NLAT and NMOS                                                                                  |
| ILMOS    | IndGridLand                           | Index of grid cell corresponding to current element of gathered vector of land surface variables [ ]      |
| IMIN     | CurrentMin                            | Min Elapsed in the current hour                                                                           |
| IPCP     |                                       | Switches for the codebase, mostly CLASS related                                                           |
| ISLFD    |                                       | Switches for the codebase, mostly CLASS related                                                           |
| ISNOALB  |                                       | Switches for the codebase, mostly CLASS related                                                           |
| ITG      |                                       | Switches for the codebase, mostly CLASS related                                                           |
| IWMOS    | IndGridWater                          | Index of grid cell corresponding to current element of gathered vector of inland water body variables [ ] |
| IYEAR    | CurrentYear                           | Year of Run                                                                                               |
| IZREF    |                                       | Switches for the codebase, mostly CLASS related                                                           |

|          |                                     |                                                                                                             |
|----------|-------------------------------------|-------------------------------------------------------------------------------------------------------------|
| JLMOS    | IndMosaicLand                       | Index of mosaic tile corresponding to current element of gathered vector of land surface variables [ ]      |
| JWMOS    | IndMosaicWater                      | Index of mosaic tile corresponding to current element of gathered vector of inland water body variables [ ] |
| LKICEH   | LakeIceHeight                       | Height (depth) of the ice on the lake                                                                       |
| LLAKGAT  | LakeLength                          | Length of longest lake axis                                                                                 |
| LLAKROT  | LakeLength_In                       | Length of longest lake axis (ROT)                                                                           |
| MIDROT   | MosaicTileType                      | Mosaic tile type identifier (1 for land surface, 0 for inland lake)                                         |
| N        | IterationCounter                    |                                                                                                             |
| NBS      |                                     |                                                                                                             |
| NCOUNT   | DayCounter                          |                                                                                                             |
| NDAY     | NumberOfIterationsIn24Hours         |                                                                                                             |
| NLAKGAT  | NumOfLakeLayers                     |                                                                                                             |
| NLAKMAX  | MaxNumOfLakes                       |                                                                                                             |
| NLAKROT  | NumOfLakeLayers_In                  |                                                                                                             |
| NLAT     | NumOfGridCells                      | Maximum number of grid cells to be modelled                                                                 |
| NLTEST   | NumOfGridCellsInRun                 | The number of grid cells for this test run                                                                  |
| NML      | TotalNumberOfMosaicTilesThatAreSurf | Total number of mosaic tiles in land surface gather vectors                                                 |
| NMOS     | NumOfMosaicTiles                    | Maximum number of mosaic tiles per grid cell being modelled                                                 |
| NMTEST   | NumOfMosaicTilesPerGridCellInRun    | The number of mosaic tiles per grid cell for this test run                                                  |
| NMW      | TotalNumberOfMosaicTilesThatAreH2O  | Total number of mosaic tiles in inland water gather vectors                                                 |
| PADRLGAT | PartialPressureOfDryAir             | Partial pressure of dry air [Pa]                                                                            |
| PADRROW  | PartialPressureOfDryAir_In          | Partial pressure of dry air [Pa]                                                                            |
| PCPLGAT  | PrecipOnLake                        | Diagnosed precipitation incident on lake [kg m-2 s-1]                                                       |
| PCPLROT  | PrecipOnLake_In                     | Diagnosed precipitation incident on lake [kg m-2 s-1] (ROT)                                                 |
| PCPNLGAT | PrecipOnSnow                        | Diagnosed precipitation incident on snow pack [kg m-2 s-1]                                                  |
| PCPNLROT | PrecipOnSnow_In                     | Diagnosed precipitation incident on snow pack [kg m-2 s-1] (ROT)                                            |
| PETLGAT  | DiagPotentialEvap                   | Diagnosed potential evapotranspiration [kg m-2 s-1]                                                         |
| PETLROT  | DiagPotentialEvap_In                | Diagnosed potential evapotranspiration [kg m-2 s-1] (ROT)                                                   |
| PI       | Pi                                  | Universal constant Pi fixed to 10 <sup>-13</sup> precision                                                  |
| PREROW   | SurfacePrecipRate_In                | Surface precipitation rate [kg m-2 s-1]                                                                     |
| PRESGAT  | SurfaceAirPressure                  | Surface air pressure [Pa]                                                                                   |
| PRESROW  | SurfaceAirPressure_In               | Surface air pressure [Pa]                                                                                   |
| QAGAT    | SpecificHumidityAtRef               | Specific humidity at reference height [kg kg-1]                                                             |

|           |                                  |                                                                                                                                                   |
|-----------|----------------------------------|---------------------------------------------------------------------------------------------------------------------------------------------------|
| QAROW     | SpecificHumidityAtRef_In         | Specific humidity at reference height [kg kg <sup>-1</sup> ]                                                                                      |
| QEVPLGAT  | LatentHeatFromLakeSubarea        | Latent heat flux from lake subarea [W m <sup>-2</sup> ]                                                                                           |
| QEVPLROT  | LatentHeatFromLakeSubarea_In     | Latent heat flux from lake subarea [W m <sup>-2</sup> ] (ROT)                                                                                     |
|           |                                  | Evaporation from the lake (added with sublimation (QFN) from snow to get EVAP flux), in CLASS functions it is redefined as QFG (Evap from ground) |
| QFLGAT    | LakeSurfaceEvap                  | Evaporation from the lake (ROT)                                                                                                                   |
| QFLROT    | LakeSurfaceEvap_In               | Evaporation from the lake (ROT)                                                                                                                   |
| QFNLGAT   | SnowSublimation                  | Sublimation from snow pack [kg m <sup>-2</sup> s <sup>-1</sup> ]                                                                                  |
| QFNLRROT  | SnowSublimation_In               | Sublimation from snow pack [kg m <sup>-2</sup> s <sup>-1</sup> ] (ROT)                                                                            |
| QFSLGAT   | SensibleHeatFromSnowSubarea      |                                                                                                                                                   |
| QFSLROT   | SensibleHeatFromSnowSubarea_In   |                                                                                                                                                   |
|           |                                  | Product of surface drag coefficient, wind speed and surface-air specific humidity difference [m s <sup>-1</sup> ]                                 |
| QFXLGAT   | ProdLakeDragWindSpdDelSpHumid    | Product of surface drag coefficient, wind speed and surface-air specific humidity difference [m s <sup>-1</sup> ] (ROT)                           |
| QFXLRROT  | ProdLakeDragWindSpdDelSpHumid_In | Product of surface drag coefficient, wind speed and surface-air specific humidity difference [m s <sup>-1</sup> ] (ROT)                           |
| QGLGAT    | DiagSurfSpecificHumidity         | Diagnosed surface specific humidity [kg kg <sup>-1</sup> ]                                                                                        |
| QGLROT    | DiagSurfSpecificHumidity_In      | Diagnosed surface specific humidity [kg kg <sup>-1</sup> ] (ROT)                                                                                  |
| QLWOLGAT  | LongwaveUpwelling                | Upwelling longwave radiation from lake surface [W m <sup>-2</sup> ] (L↑g)                                                                         |
| QLWOLROT  | LongwaveUpwelling_In             | Upwelling longwave radiation from lake surface [W m <sup>-2</sup> ] (L↑g) (ROT)                                                                   |
| QSENLGAT  | SensibleHeatFromLakeSubarea      | Sensible heat flux from lake subarea [W m <sup>-2</sup> ]                                                                                         |
| QSENLROT  | SensibleHeatFromLakeSubarea_In   | Sensible heat flux from lake subarea [W m <sup>-2</sup> ] (ROT)                                                                                   |
| RADJLGAT  | LatitudeInRad                    | Latitude of grid cell (positive north of equator) [rad]                                                                                           |
| RADJROW   | LatitudeInRad_In                 | Latitude of grid cell (positive north of equator) [rad]                                                                                           |
| RGAS      | GasConstant                      | Gas constant [J kg <sup>-1</sup> K <sup>-1</sup> ]                                                                                                |
| RGASV     | GasConstantOfH2OVapour           | Gas constant for water vapour [J kg <sup>-1</sup> K <sup>-1</sup> ]                                                                               |
| RHOAGAT   | DensityOfAir                     | Density of air [kg m <sup>-3</sup> ]                                                                                                              |
| RHOAROW   | DensityOfAir_In                  | Density of air [kg m <sup>-3</sup> ]                                                                                                              |
| RHOICE    | DensityOfIce                     | Density of ice [kg m <sup>-3</sup> ], defined as 0.917 x 10 <sup>3</sup>                                                                          |
| RHOIW     | DensityRatioOfIceToWater         | Ratio of density of ice to water                                                                                                                  |
| RHOMIX    | MixLyrDensity                    | Density of the mixing layer                                                                                                                       |
| RHOSLGAT  | SnowPackDensity                  | Density of snow [kg m <sup>-3</sup> ] (ps)                                                                                                        |
| RHOSLRROT | SnowPackDensity_In               | Density of snow [kg m <sup>-3</sup> ] (ps) (ROT)                                                                                                  |
| RHOW      | DensityOfH2O                     | Density of water [kg m <sup>-3</sup> ], defined as 1 x 10 <sup>3</sup>                                                                            |
| RHSILGAT  | DensityOfFreshSnow               | Density of fresh snow [kg m <sup>-3</sup> ]                                                                                                       |

|          |                                           |                                                                                                                    |
|----------|-------------------------------------------|--------------------------------------------------------------------------------------------------------------------|
| RHSIROW  | DensityOfFreshSnow_In                     | Density of fresh snow [kg m <sup>-3</sup> ]                                                                        |
| ROFICEH  | RunoffFromIce                             | Runoffice                                                                                                          |
| ROFNLGAT | SnowRunoff                                | Liquid water runoff from snow pack [kg m <sup>-2</sup> s <sup>-1</sup> ]                                           |
| ROFNLROT | SnowRunoff_In                             | Liquid water runoff from snow pack [kg m <sup>-2</sup> s <sup>-1</sup> ] (ROT)                                     |
| RPCPLGAT | WetPrecip                                 | Rainfall rate over modelled area [m s <sup>-1</sup> ]                                                              |
| RPCPROW  | WetPrecip_In                              | Rainfall rate over modelled area [m s <sup>-1</sup> ]                                                              |
| SBC      | StefanBoltzmannConst                      | Stefan-Boltzmann constant [W m <sup>-2</sup> K <sup>-4</sup> ]                                                     |
| SFHLGAT  | DiagRelavtiveHumidAtScreenLevel           | Diagnosed screen-level relative humidity [%]                                                                       |
| SFHLROT  | DiagRelavtiveHumidAtScreenLevel_In        | Diagnosed screen-level relative humidity [%] (ROT)                                                                 |
| SFQLGAT  | DiagSpecificHumidAtScreenLevel            | Diagnosed screen-level specific humidity [kg kg <sup>-1</sup> ]                                                    |
| SFQLROT  | DiagSpecificHumidAtScreenLevel_In         | Diagnosed screen-level specific humidity [kg kg <sup>-1</sup> ] (ROT)                                              |
| SFTLGAT  | DiagAirTempAtScreenLevel                  | Diagnosed screen-level air temperature [K]                                                                         |
| SFTLROT  | DiagAirTempAtScreenLevel_In               | Diagnosed screen-level air temperature [K] (ROT)                                                                   |
| SFULGAT  | DiagZonalWindSpdAtAnemometerLevel         | Diagnosed anemometer-level zonal wind [m s <sup>-1</sup> ]                                                         |
| SFULROT  | DiagZonalWindSpdAtAnemometerLevel_In      | Diagnosed anemometer-level zonal wind [m s <sup>-1</sup> ] (ROT)                                                   |
| SFVLGAT  | DiagMeridionalWindSpdAtAnemometerLevel    | Diagnosed anemometer-level meridional wind [m s <sup>-1</sup> ]                                                    |
| SFVLROT  | DiagMeridionalWindSpdAtAnemometerLevel_In | Diagnosed anemometer-level meridional wind [m s <sup>-1</sup> ] (ROT)                                              |
| SNICEH   | SnowIceHeight                             | Snow Ice Height                                                                                                    |
| SNOLGAT  | SnowPackMass                              | Mass of snow pack [kg m <sup>-2</sup> ] (Ws)                                                                       |
| SNOLROT  | SnowPackMass_In                           | Mass of snow pack [kg m <sup>-2</sup> ] (Ws) (ROT)                                                                 |
| SPCPLGAT | FrozenPrecip                              | Snowfall rate over modelled area [m s <sup>-1</sup> ]                                                              |
| SPCPROW  | FrozenPrecip_In                           | Snowfall rate over modelled area [m s <sup>-1</sup> ]                                                              |
| SPHAIR   | SpecificHeatOfAir                         | Specific heat of air [J kg <sup>-1</sup> K <sup>-1</sup> ]                                                         |
| SPHICE   | SpecificHeatOfIce                         | Specific heat of ice [J m <sup>-3</sup> K <sup>-1</sup> ], defined as 2.10 x 10 <sup>3</sup>                       |
| SPHW     | SpecificHeatOfH2O                         | Specific heat of water [J m <sup>-3</sup> K <sup>-1</sup> ], defined as 4.186 x 10 <sup>3</sup>                    |
| TOLAK    | LakeSkinTemp                              | Skin temperature of the lake                                                                                       |
| TADPROW  | DewPointTemp_In                           | Dew point temperature of air [K]                                                                                   |
| TAGAT    | AirTempAtRef                              | Air temperature at reference height [K]                                                                            |
| TAROW    | AirTempAtRef_In                           | Air temperature at reference height [K]                                                                            |
| TCICE    | ThermalConductOfIce                       | Thermal conductivity of ice [W m <sup>-1</sup> K <sup>-1</sup> ], defined as 2.24                                  |
| TCW      | ThermalConductOfH2O                       | Thermal conductivity of water [W m <sup>-1</sup> K <sup>-1</sup> ], defined as 0.57                                |
| TFREZ    | FreezingPointOfH2O                        | Freezing point of water [K]                                                                                        |
| TFXLGAT  | ProdLakeDragWindSpdDelT                   | Product of lake surface drag coefficient, wind speed and surface-air temperature difference [K m s <sup>-1</sup> ] |

|          |                               |                                                                                                                          |
|----------|-------------------------------|--------------------------------------------------------------------------------------------------------------------------|
| TFXLROT  | ProdLakeDragWindSpdDeIT_In    | Product of lake surface drag coefficient, wind speed and surface-air temperature difference [K m s-1] (ROT)              |
| TKECE    | TotalKineticEnergyEff_CE      | Total Kinetic Energy process efficiency 'CE', defined in MacKay 2012 as 1.15                                             |
| TKECF    | TotalKineticEnergyEff_CF      | Total Kinetic Energy process efficiency 'CF', defined in MacKay 2012 as 0.25                                             |
| TKECL    | TotalKineticEnergyEff_CL      | Total Kinetic Energy process efficiency 'CL', defined in MacKay 2012 as 0.235 but large uncertainty exists in this value |
| TKECN    | TotalKineticEnergyEff_CN      | Total Kinetic Energy process efficiency 'CN', defined in MacKay 2012 as 1.33                                             |
| TKECS    | TotalKineticEnergyEff_CS      | Total Kinetic Energy process efficiency 'CS', defined in MacKay 2012 as 0.2                                              |
| TKELAK   | TotalKineticEnergy            | Total Kinetic Energy in mixing layer, used in MixLayer()                                                                 |
| TKEMIN   | MinimumKineticEnergy          | Minimum Kinetic Energy, set at $1 \times 10^{-12}$                                                                       |
| TLAKGAT  | LakeTempProfile               |                                                                                                                          |
| TLAKROT  | LakeTempProfile_In            |                                                                                                                          |
| TRPCLGAT | WetPrecipTemp                 | Rainfall temperature [K]                                                                                                 |
| TRPCROW  | WetPrecipTemp_In              | Rainfall temperature [K]                                                                                                 |
| TSED     | SedimentTemp                  | Sediment Temperature                                                                                                     |
| TSNOLGAT | SnowPackTemp                  | Snowpack temperature [K] (Ts)                                                                                            |
| TSNOLROT | SnowPackTemp_In               | Snowpack temperature [K] (Ts) (ROT)                                                                                      |
| TSPCLGAT | FrozenPrecipTemp              | Snowfall temperature [K]                                                                                                 |
| TSPCROW  | FrozenPrecipTemp_In           | Snowfall temperature [K]                                                                                                 |
| ULGAT    | ZonalWindSpeed                | Zonal component of wind speed [m s-1]                                                                                    |
| ULROW    | ZonalWindSpeed_In             | Zonal component of wind speed [m s-1]                                                                                    |
| UVROW    | WindSpeed                     | Wind speed [m s-1]                                                                                                       |
| VKC      | VonKarmanConst                | Von Karman constant, defined as 0.4                                                                                      |
| VLGAT    | MeridionalWindSpeed           | Meridional component of wind speed [m s-1]                                                                               |
| VLROW    | MeridionalWindSpeed_In        | Meridional component of wind speed [m s-1]                                                                               |
| VMIN     | MinWindSpd                    | Minimum wind speed [m s-1], defined as 0.1                                                                               |
| VPDROW   | VapourPressureDeficit_In      | Vapour pressure deficit [mb]                                                                                             |
| WSNOLGAT | SnowPackLiquidWaterContent    | Liquid water content of snow pack [kg m-2]                                                                               |
| WSNOLROT | SnowPackLiquidWaterContent_In | Liquid water content of snow pack [kg m-2] (ROT)                                                                         |



|         |                                          |                                                                                                                               |
|---------|------------------------------------------|-------------------------------------------------------------------------------------------------------------------------------|
| ZBLDROW | AtmoBlendingHeightForSurfaceRoughness_In | Atmospheric blending height for surface roughness length averaging [m],<br>Geophysical data, 5th number on 4th line of ini    |
| ZBOT    | CurrentLayerBottom                       | Bottom of the current layer for local calculations                                                                            |
| ZDHLGAT | VarHeight                                | User-specified height associated with diagnosed screen-level variables<br>[m]                                                 |
| ZDHRW   | VarHeight_In                             | User-specified height associated with diagnosed screen-level variables<br>[m]                                                 |
| ZDMLGAT | AnemometerHeight                         | User-specified height associated with diagnosed anemometer-level wind<br>speed [m]                                            |
| ZDMROW  | AnemometerHeight_In                      | User-specified height associated with diagnosed anemometer-level wind<br>speed [m]                                            |
| ZRFHGAT | RefHeightAirTempAndHumidForcing          | Reference height associated with forcing air temperature and humidity<br>[m], Geophysical data, 4rd number on 4th line of ini |
| ZRFHROW | RefHeightAirTempAndHumidForcing_In       | Reference height associated with forcing air temperature and humidity<br>[m], Geophysical data, 4rd number on 4th line of ini |
| ZRFMGAT | RefHeightWindSpeedForcing                | Reference height associated with forcing wind speed [m], "Geophysical<br>data", 3rd number on 4th line of ini                 |
| ZRFMROW | RefHeightWindSpeedForcing_In             | Reference height associated with forcing wind speed [m], "Geophysical<br>data", 3rd number on 4th line of ini                 |
| ZTOP    | CurrentLayerTop                          | Top of current layer for calculations                                                                                         |
