# Supplementary material for: An open source refactoring of the Canadian small lakes model for estimates of evaporation from medium sized reservoirs
Source: Copernicus journal article supplement (doi:10.5194/egusphere-2023-3093), 2024-01-18
Supplement: Supplementary file [file egusphere-2023-3093-AC2-supplement.pdf]

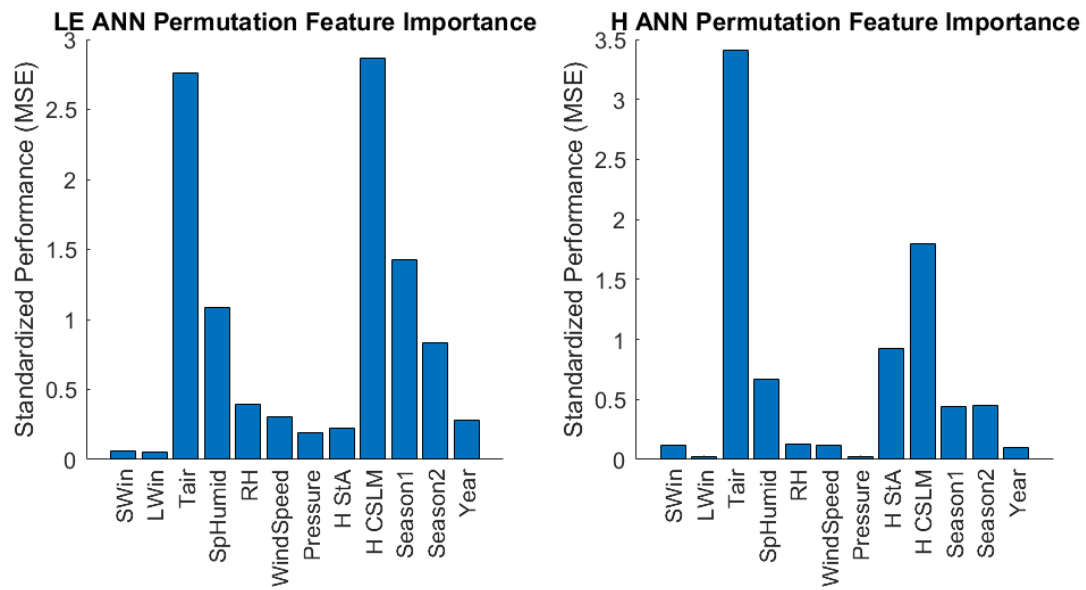

Figure S1: Standardized feature performance (mean squared error) from permutation analysis on Artificial Neural Networks used for gap filling latent heat (left) and sensible heat (right). Higher value implies greater error associated with randomizing the sequence of the input feature.
