# Supplementary material for: An open source refactoring of the Canadian small lakes model for estimates of evaporation from medium sized reservoirs
Source: Copernicus journal article supplement (doi:10.5194/egusphere-2023-3093), 2024-01-18
Supplement: Supplementary file [file egusphere-2023-3093-AC3-supplement.pdf]

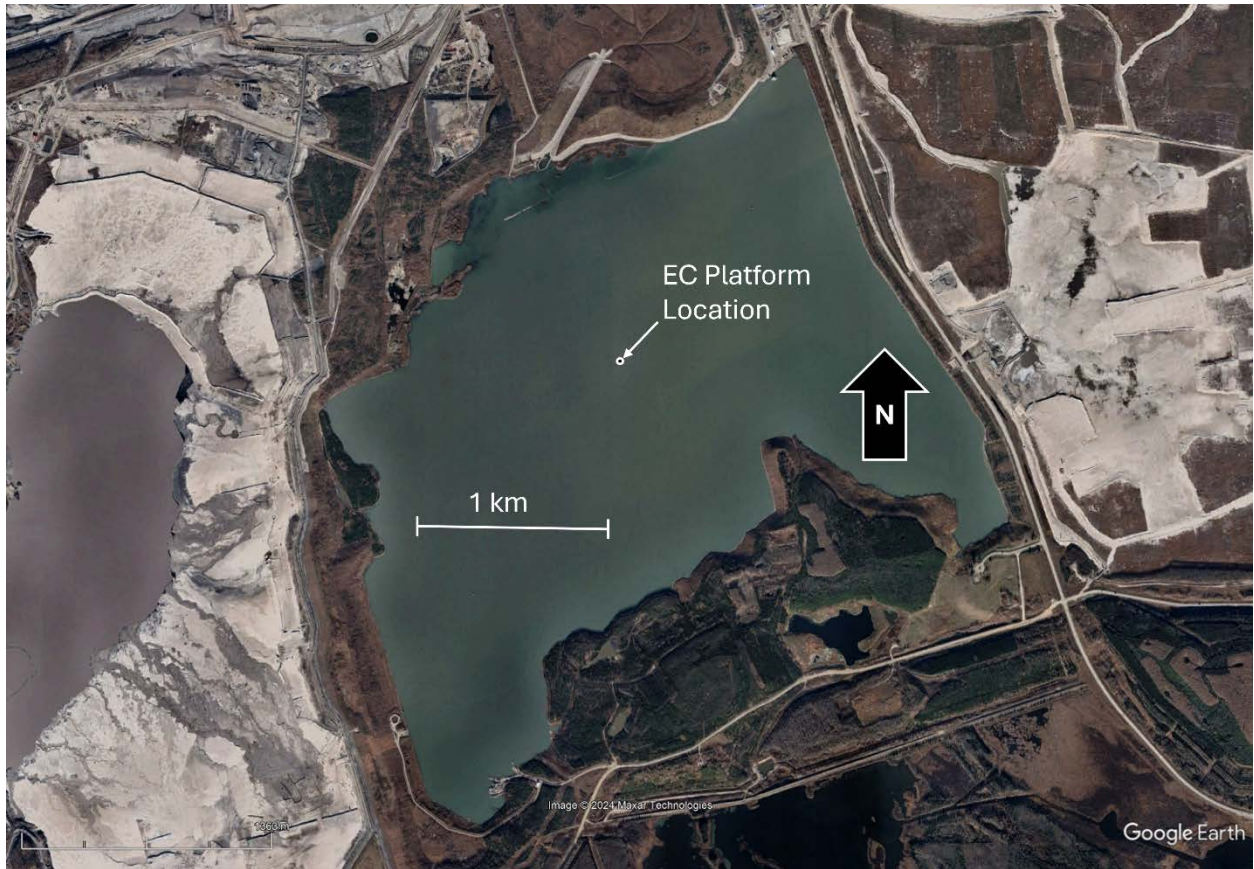

Supplementary Figure 2: Base Mine Lake, platform location, and surrounding area. Google Earth.
